# Supplementary material for: Genome Diversity and Signatures of Selection for Production and Performance Traits in Dromedary Camels
Source: Front Genet. 2019 Sep 19;10:893. doi: 10.3389/fgene.2019.00893 (PMC6761857; doi:10.3389/fgene.2019.00893)
Supplement: Supplementary file 5 [file Table_5.xlsx]

## Sheet: packing_racing_overlap
Supplementary Table 5: Overlapping candidate genomic regions between packing and racing camels, and between all Sudanese with packing camels, racing camels, and packing and racing overlaps
scaffold	start (bp)	stop (bp)
NW_011590959.1	150001	225000
NW_011590964.1	5850001	5925000
NW_011590966.1	725001	800000
NW_011590966.1	6500001	6575000
NW_011590969.1	1150001	1200000
NW_011590970.1	5275001	5350000
NW_011590971.1	1325001	1375000
NW_011590973.1	7950001	8000000
NW_011590978.1	800001	875000
NW_011590979.1	11150001	11200000
NW_011590980.1	600001	675000
NW_011590980.1	6875001	6950000
NW_011590994.1	750001	825000
NW_011590996.1	9800001	9875000
NW_011590996.1	11675001	11725000
NW_011590999.1	8950001	9000000
NW_011591005.1	625001	675000
NW_011591011.1	1000001	1075000
NW_011591012.1	950001	1025000
NW_011591017.1	1375001	1450000
NW_011591017.1	5975001	6050000
NW_011591028.1	7275001	7350000
NW_011591039.1	13200001	13275000
NW_011591049.1	1900001	1975000
NW_011591049.1	2625001	2700000
NW_011591061.1	8225001	8275000
NW_011591062.1	1	50000
NW_011591065.1	100001	150000
NW_011591074.1	6575001	6650000
NW_011591074.1	7875001	7950000
NW_011591082.1	50001	125000
NW_011591086.1	575001	650000
NW_011591092.1	2825001	2900000
NW_011591096.1	125001	200000
NW_011591101.1	1	50000
NW_011591106.1	7100001	7175000
NW_011591109.1	2225001	2275000
NW_011591115.1	475001	550000
NW_011591115.1	3175001	3250000
NW_011591131.1	3150001	3225000
NW_011591134.1	1150001	1200000
NW_011591135.1	250001	300000
NW_011591136.1	2275001	2350000
NW_011591139.1	1150001	1200000
NW_011591145.1	3700001	3775000
NW_011591149.1	600001	675000
NW_011591158.1	2050001	2125000
NW_011591169.1	425001	475000
NW_011591178.1	350001	425000
NW_011591181.1	2350001	2425000
NW_011591185.1	1025001	1075000
NW_011591192.1	100001	175000
NW_011591194.1	325001	375000
NW_011591195.1	2500001	2550000
NW_011591195.1	5525001	5600000
NW_011591221.1	3600001	3650000
NW_011591226.1	1450001	1525000
NW_011591235.1	225001	300000
NW_011591236.1	2925001	2975000
NW_011591258.1	6350001	6425000
NW_011591290.1	4550001	4625000
NW_011591302.1	4200001	4275000
NW_011591304.1	550001	625000
NW_011591304.1	2025001	2075000
NW_011591336.1	2550001	2625000
NW_011591350.1	500001	550000
NW_011591353.1	1675001	1750000
NW_011591356.1	650001	700000
NW_011591359.1	3075001	3150000
NW_011591359.1	5000001	5075000
NW_011591359.1	7400001	7475000
NW_011591362.1	5000001	5075000
NW_011591369.1	1	50000
NW_011591407.1	1650001	1700000
NW_011591411.1	1150001	1225000
NW_011591414.1	125001	175000
NW_011591434.1	275001	325000
NW_011591447.1	1050001	1125000
NW_011591469.1	5575001	5650000
NW_011591498.1	550001	600000
NW_011591505.1	2525001	2600000
NW_011591518.1	3500001	3575000
NW_011591518.1	4600001	4650000
NW_011591527.1	50001	100000
NW_011591548.1	3975001	4050000
NW_011591607.1	4300001	4375000
NW_011591607.1	5725001	5800000
						NW_011591609.1	1	50000
						NW_011591649.1	1650001	1725000
						NW_011591660.1	2225001	2300000
						NW_011591705.1	3075001	3150000
						NW_011591716.1	1	50000
						NW_011591728.1	1275001	1350000
						NW_011591734.1	1775001	1825000
						NW_011591736.1	525001	600000
						NW_011591749.1	275001	325000
						NW_011591834.1	675001	750000
						NW_011591857.1	1	50000
						NW_011591913.1	2900001	2975000
						NW_011591927.1	25001	75000
						NW_011592100.1	50001	100000
						NW_011592128.1	725001	800000
						NW_011592143.1	1	50000
						NW_011592191.1	1	50000
						NW_011592200.1	1	50000
						NW_011592286.1	125001	175000
						NW_011592300.1	300001	350000
						NW_011592419.1	125001	200000
						NW_011592609.1	1	50000
						NW_011593236.1	1	50000
						NW_011593345.1	1	50000
						NW_011593381.1	1	50000
						NW_011593448.1	500001	575000
						NW_011593450.1	1	50000
						NW_011593472.1	1	50000
						NW_011593548.1	1	50000
						NW_011593585.1	1	50000
						NW_011593662.1	1	50000
						NW_011593777.1	800001	875000
						NW_011594265.1	1	50000
						NW_011594451.1	1	50000
						NW_011594678.1	1	50000
						NW_011594778.1	1	50000
						NW_011594807.1	800001	875000
						NW_011595470.1	1	50000
						NW_011595579.1	1	50000
						NW_011597112.1	1	50000
						NW_011599535.1	1	50000
						NW_011599563.1	1	50000
						NW_011599768.1	1	50000
						NW_011610426.1	1	50000
						NW_011611731.1	1	50000
						NW_011619554.1	1	50000

## Sheet: all sudanese_packing_overlap
scaffold	start (bp)	stop (bp)
NW_011590959.1	150001	225000
NW_011590964.1	5850001	5925000
NW_011590966.1	725001	800000
NW_011590966.1	6500001	6575000
NW_011590969.1	1150001	1200000
NW_011590970.1	5275001	5350000
NW_011590971.1	1325001	1375000
NW_011590973.1	7950001	8000000
NW_011590978.1	800001	875000
NW_011590979.1	11150001	11200000
NW_011590980.1	600001	675000
NW_011590980.1	6875001	6950000
NW_011590982.1	675001	725000
NW_011590994.1	750001	825000
NW_011590996.1	9800001	9875000
NW_011590996.1	11675001	11725000
NW_011590999.1	8950001	9000000
NW_011591003.1	1150001	1225000
NW_011591005.1	625001	675000
NW_011591011.1	1000001	1075000
NW_011591012.1	950001	1025000
NW_011591017.1	1375001	1450000
NW_011591017.1	5975001	6050000
NW_011591028.1	7275001	7350000
NW_011591037.1	200001	275000
NW_011591037.1	3050001	3125000
NW_011591039.1	13200001	13275000
NW_011591049.1	1900001	1975000
NW_011591049.1	2625001	2700000
NW_011591061.1	8225001	8275000
NW_011591062.1	1	50000
NW_011591065.1	100001	150000
NW_011591074.1	6575001	6650000
NW_011591074.1	7875001	7950000
NW_011591082.1	50001	125000
NW_011591084.1	925001	1000000
NW_011591086.1	575001	650000
NW_011591092.1	2825001	2900000
NW_011591096.1	125001	200000
NW_011591101.1	1	50000
NW_011591106.1	7100001	7175000
NW_011591109.1	2225001	2275000
NW_011591115.1	475001	550000
NW_011591115.1	3175001	3250000
NW_011591131.1	3150001	3225000
NW_011591134.1	1150001	1200000
NW_011591135.1	250001	300000
NW_011591136.1	2275001	2350000
NW_011591139.1	1150001	1200000
NW_011591145.1	3700001	3775000
NW_011591149.1	600001	675000
NW_011591158.1	2050001	2125000
NW_011591169.1	425001	475000
NW_011591178.1	350001	425000
NW_011591178.1	675001	750000
NW_011591181.1	2350001	2425000
NW_011591185.1	1025001	1075000
NW_011591194.1	325001	375000
NW_011591195.1	2500001	2550000
NW_011591195.1	5525001	5600000
NW_011591221.1	3600001	3650000
NW_011591226.1	1450001	1525000
NW_011591235.1	225001	300000
NW_011591235.1	550001	600000
NW_011591236.1	2925001	2975000
NW_011591243.1	25001	100000
NW_011591254.1	50001	100000
NW_011591258.1	6350001	6425000
NW_011591259.1	2725001	2800000
NW_011591284.1	2525001	2600000
NW_011591289.1	175001	250000
NW_011591290.1	4550001	4625000
NW_011591302.1	4200001	4275000
NW_011591304.1	1	50000
NW_011591304.1	550001	625000
NW_011591304.1	2025001	2075000
NW_011591336.1	2550001	2625000
NW_011591336.1	4350001	4425000
NW_011591350.1	500001	550000
NW_011591353.1	1675001	1750000
NW_011591356.1	650001	700000
NW_011591359.1	3075001	3150000
NW_011591359.1	5000001	5075000
NW_011591359.1	7400001	7475000
NW_011591362.1	5000001	5075000
NW_011591369.1	1	50000
NW_011591407.1	1650001	1700000
NW_011591411.1	1150001	1225000
NW_011591414.1	125001	175000
NW_011591434.1	275001	325000
NW_011591447.1	1050001	1125000
NW_011591469.1	5575001	5650000
NW_011591477.1	1550001	1600000
NW_011591498.1	550001	600000
NW_011591505.1	2525001	2600000
NW_011591518.1	3500001	3575000
NW_011591518.1	4600001	4650000
NW_011591527.1	50001	100000
NW_011591548.1	3800001	3875000
NW_011591548.1	3975001	4050000
NW_011591607.1	4300001	4375000
NW_011591607.1	5725001	5800000
NW_011591609.1	1	50000
NW_011591649.1	1650001	1725000
NW_011591660.1	2225001	2300000
NW_011591705.1	3075001	3150000
NW_011591716.1	1	50000
NW_011591728.1	1275001	1350000
NW_011591734.1	1775001	1825000
NW_011591736.1	525001	600000
NW_011591749.1	275001	325000
NW_011591769.1	575001	625000
NW_011591794.1	850001	925000
NW_011591834.1	675001	750000
NW_011591857.1	1	50000
NW_011591895.1	225001	275000
NW_011591913.1	2900001	2975000
NW_011591927.1	25001	75000
NW_011592012.1	225001	275000
NW_011592100.1	50001	100000
NW_011592100.1	175001	250000
NW_011592128.1	725001	800000
NW_011592143.1	1	50000
NW_011592191.1	1	50000
NW_011592193.1	1	50000
NW_011592200.1	1	50000
NW_011592286.1	125001	175000
NW_011592300.1	300001	350000
NW_011592419.1	125001	200000
NW_011592609.1	1	50000
NW_011593194.1	950001	1000000
NW_011593236.1	1	50000
NW_011593245.1	1	50000
NW_011593345.1	1	50000
NW_011593381.1	1	50000
NW_011593448.1	500001	575000
NW_011593450.1	1	50000
NW_011593472.1	1	50000
NW_011593548.1	1	50000
NW_011593585.1	1	50000
NW_011593662.1	1	50000
NW_011593777.1	800001	875000
NW_011593801.1	1	50000
NW_011594265.1	1	50000
NW_011594451.1	1	50000
NW_011594678.1	1	50000
NW_011594778.1	1	50000
NW_011594807.1	800001	875000
NW_011595470.1	1	50000
NW_011595579.1	1	50000
NW_011597112.1	1	50000
NW_011597206.1	1	50000
NW_011599535.1	1	50000
NW_011599563.1	1	50000
NW_011599768.1	1	50000
NW_011610426.1	1	50000
NW_011611731.1	1	50000
NW_011619554.1	1	50000
NW_011621772.1	1	50000

## Sheet: all Sudanese_racing_overlap
scaffold	start(bp)	stop(bp)
NW_011590959.1	150001	225000
NW_011590964.1	3550001	3625000
NW_011590964.1	5850001	5925000
NW_011590966.1	725001	800000
NW_011590966.1	6500001	6575000
NW_011590969.1	1150001	1200000
NW_011590970.1	5275001	5350000
NW_011590971.1	1325001	1375000
NW_011590973.1	475001	550000
NW_011590973.1	7950001	8000000
NW_011590978.1	800001	875000
NW_011590979.1	9400001	9450000
NW_011590979.1	11150001	11200000
NW_011590980.1	600001	675000
NW_011590980.1	6875001	6950000
NW_011590994.1	750001	825000
NW_011590996.1	9800001	9875000
NW_011590996.1	11675001	11725000
NW_011590999.1	8950001	9000000
NW_011591005.1	625001	675000
NW_011591011.1	1000001	1075000
NW_011591012.1	950001	1025000
NW_011591017.1	1375001	1450000
NW_011591017.1	5975001	6050000
NW_011591028.1	7275001	7350000
NW_011591039.1	13200001	13275000
NW_011591049.1	1900001	1975000
NW_011591049.1	2625001	2700000
NW_011591061.1	8225001	8275000
NW_011591062.1	1	50000
NW_011591065.1	100001	150000
NW_011591074.1	6575001	6650000
NW_011591074.1	7875001	7950000
NW_011591082.1	50001	125000
NW_011591086.1	575001	650000
NW_011591092.1	2825001	2900000
NW_011591096.1	125001	200000
NW_011591101.1	1	50000
NW_011591106.1	7100001	7175000
NW_011591109.1	2225001	2300000
NW_011591115.1	475001	550000
NW_011591115.1	3175001	3250000
NW_011591131.1	3150001	3225000
NW_011591134.1	1150001	1200000
NW_011591135.1	250001	300000
NW_011591136.1	2275001	2350000
NW_011591139.1	1150001	1200000
NW_011591142.1	1075001	1150000
NW_011591145.1	3700001	3775000
NW_011591149.1	600001	675000
NW_011591158.1	2050001	2125000
NW_011591169.1	425001	475000
NW_011591178.1	350001	425000
NW_011591181.1	2350001	2425000
NW_011591183.1	7950001	8000000
NW_011591185.1	1025001	1075000
NW_011591194.1	325001	375000
NW_011591195.1	2500001	2550000
NW_011591195.1	5525001	5600000
NW_011591205.1	5450001	5500000
NW_011591221.1	3600001	3650000
NW_011591226.1	1450001	1525000
NW_011591234.1	3900001	3975000
NW_011591235.1	225001	300000
NW_011591236.1	2925001	2975000
NW_011591258.1	5150001	5225000
NW_011591258.1	6350001	6425000
NW_011591290.1	4550001	4625000
NW_011591302.1	4200001	4275000
NW_011591304.1	550001	625000
NW_011591304.1	2025001	2075000
NW_011591336.1	2550001	2625000
NW_011591346.1	4825001	4900000
NW_011591350.1	500001	550000
NW_011591353.1	1675001	1750000
NW_011591356.1	650001	725000
NW_011591359.1	3075001	3150000
NW_011591359.1	5000001	5075000
NW_011591359.1	7400001	7475000
NW_011591362.1	5000001	5075000
NW_011591369.1	1	50000
NW_011591407.1	1650001	1700000
NW_011591411.1	1150001	1225000
NW_011591414.1	125001	200000
NW_011591434.1	275001	325000
NW_011591447.1	1050001	1125000
NW_011591469.1	5575001	5650000
NW_011591498.1	550001	600000
NW_011591505.1	2525001	2600000
NW_011591505.1	2750001	2825000
NW_011591518.1	3500001	3575000
NW_011591518.1	4600001	4650000
NW_011591527.1	50001	100000
NW_011591548.1	3975001	4050000
NW_011591607.1	4300001	4375000
NW_011591607.1	5725001	5800000
NW_011591609.1	1	50000
NW_011591632.1	1925001	1975000
NW_011591649.1	1650001	1725000
NW_011591660.1	2225001	2300000
NW_011591662.1	7875001	7925000
NW_011591705.1	3075001	3150000
NW_011591716.1	1	50000
NW_011591728.1	1275001	1350000
NW_011591734.1	1775001	1825000
NW_011591736.1	525001	600000
NW_011591749.1	275001	325000
NW_011591802.1	1	50000
NW_011591834.1	675001	750000
NW_011591857.1	1	50000
NW_011591913.1	2900001	2975000
NW_011591927.1	25001	75000
NW_011591935.1	1	75000
NW_011592100.1	50001	100000
NW_011592128.1	725001	800000
NW_011592143.1	1	50000
NW_011592191.1	1	50000
NW_011592200.1	1	50000
NW_011592286.1	125001	175000
NW_011592300.1	300001	350000
NW_011592419.1	125001	200000
NW_011592609.1	1	50000
NW_011593236.1	1	50000
NW_011593345.1	1	50000
NW_011593381.1	1	50000
NW_011593448.1	500001	575000
NW_011593450.1	1	50000
NW_011593472.1	1	50000
NW_011593548.1	1	50000
NW_011593585.1	1	50000
NW_011593662.1	1	50000
NW_011593777.1	800001	875000
NW_011594265.1	1	50000
NW_011594451.1	1	50000
NW_011594678.1	1	50000
NW_011594778.1	1	50000
NW_011594807.1	800001	875000
NW_011595470.1	1	50000
NW_011595579.1	1	50000
NW_011597112.1	1	50000
NW_011598980.1	1	50000
NW_011599535.1	1	50000
NW_011599563.1	1	50000
NW_011599768.1	1	50000
NW_011599914.1	1	50000
NW_011610426.1	1	50000
NW_011611731.1	1	50000
NW_011619554.1	1	50000

## Sheet: all Suda_packing_racing_overlap
scaffold	start(bp)	stop(bp)
NW_011590959.1	150001	225000
NW_011590964.1	5850001	5925000
NW_011590966.1	725001	800000
NW_011590966.1	6500001	6575000
NW_011590969.1	1150001	1200000
NW_011590970.1	5275001	5350000
NW_011590971.1	1325001	1375000
NW_011590973.1	7950001	8000000
NW_011590978.1	800001	875000
NW_011590979.1	11150001	11200000
NW_011590980.1	600001	675000
NW_011590980.1	6875001	6950000
NW_011590994.1	750001	825000
NW_011590996.1	9800001	9875000
NW_011590996.1	11675001	11725000
NW_011590999.1	8950001	9000000
NW_011591005.1	625001	675000
NW_011591011.1	1000001	1075000
NW_011591012.1	950001	1025000
NW_011591017.1	1375001	1450000
NW_011591017.1	5975001	6050000
NW_011591028.1	7275001	7350000
NW_011591039.1	13200001	13275000
NW_011591049.1	1900001	1975000
NW_011591049.1	2625001	2700000
NW_011591061.1	8225001	8275000
NW_011591062.1	1	50000
NW_011591065.1	100001	150000
NW_011591074.1	6575001	6650000
NW_011591074.1	7875001	7950000
NW_011591082.1	50001	125000
NW_011591086.1	575001	650000
NW_011591092.1	2825001	2900000
NW_011591096.1	125001	200000
NW_011591101.1	1	50000
NW_011591106.1	7100001	7175000
NW_011591109.1	2225001	2275000
NW_011591115.1	475001	550000
NW_011591115.1	3175001	3250000
NW_011591131.1	3150001	3225000
NW_011591134.1	1150001	1200000
NW_011591135.1	250001	300000
NW_011591136.1	2275001	2350000
NW_011591139.1	1150001	1200000
NW_011591145.1	3700001	3775000
NW_011591149.1	600001	675000
NW_011591158.1	2050001	2125000
NW_011591169.1	425001	475000
NW_011591178.1	350001	425000
NW_011591181.1	2350001	2425000
NW_011591185.1	1025001	1075000
NW_011591194.1	325001	375000
NW_011591195.1	2500001	2550000
NW_011591195.1	5525001	5600000
NW_011591221.1	3600001	3650000
NW_011591226.1	1450001	1525000
NW_011591235.1	225001	300000
NW_011591236.1	2925001	2975000
NW_011591258.1	6350001	6425000
NW_011591290.1	4550001	4625000
NW_011591302.1	4200001	4275000
NW_011591304.1	550001	625000
NW_011591304.1	2025001	2075000
NW_011591336.1	2550001	2625000
NW_011591350.1	500001	550000
NW_011591353.1	1675001	1750000
NW_011591356.1	650001	700000
NW_011591359.1	3075001	3150000
NW_011591359.1	5000001	5075000
NW_011591359.1	7400001	7475000
NW_011591362.1	5000001	5075000
NW_011591369.1	1	50000
NW_011591407.1	1650001	1700000
NW_011591411.1	1150001	1225000
NW_011591414.1	125001	175000
NW_011591434.1	275001	325000
NW_011591447.1	1050001	1125000
NW_011591469.1	5575001	5650000
NW_011591498.1	550001	600000
NW_011591505.1	2525001	2600000
NW_011591518.1	3500001	3575000
NW_011591518.1	4600001	4650000
NW_011591527.1	50001	100000
NW_011591548.1	3975001	4050000
NW_011591607.1	4300001	4375000
NW_011591607.1	5725001	5800000
NW_011591609.1	1	50000
NW_011591649.1	1650001	1725000
NW_011591660.1	2225001	2300000
NW_011591705.1	3075001	3150000
NW_011591716.1	1	50000
NW_011591728.1	1275001	1350000
NW_011591734.1	1775001	1825000
NW_011591736.1	525001	600000
NW_011591749.1	275001	325000
NW_011591834.1	675001	750000
NW_011591857.1	1	50000
NW_011591913.1	2900001	2975000
NW_011591927.1	25001	75000
NW_011592100.1	50001	100000
NW_011592128.1	725001	800000
NW_011592143.1	1	50000
NW_011592191.1	1	50000
NW_011592200.1	1	50000
NW_011592286.1	125001	175000
NW_011592300.1	300001	350000
NW_011592419.1	125001	200000
NW_011592609.1	1	50000
NW_011593236.1	1	50000
NW_011593345.1	1	50000
NW_011593381.1	1	50000
NW_011593448.1	500001	575000
NW_011593450.1	1	50000
NW_011593472.1	1	50000
NW_011593548.1	1	50000
NW_011593585.1	1	50000
NW_011593662.1	1	50000
NW_011593777.1	800001	875000
NW_011594265.1	1	50000
NW_011594451.1	1	50000
NW_011594678.1	1	50000
NW_011594778.1	1	50000
NW_011594807.1	800001	875000
NW_011595470.1	1	50000
NW_011595579.1	1	50000
NW_011597112.1	1	50000
NW_011599535.1	1	50000
NW_011599563.1	1	50000
NW_011599768.1	1	50000
NW_011610426.1	1	50000
NW_011611731.1	1	50000
NW_011619554.1	1	50000
